# Supplementary material
Source: publisher figshare collection journal article supplement (https://frontiersin.figshare.com/ndownloader/files/28447227)
Supplement: Supplementary file 1 [file 28447227]

## Sheet: Sheet1
Supplementary table 1. The sequences of primers used in this research.
Target		Primer sequence (5′-3′)
SSH2	Forward:	GGTGCTGCCCTTTTTCTACCA
	Reverse:	GGGCGGAGTAATATGAACATTGC
TGF-B1	Forward:	CTGGGTTGAGCAAGCCTACG
	Reverse:	GGTCATTGCACATAACACGCT
SMAD2	Forward:	AAGCCATCACCACTCAGAATTG
	Reverse:	CACTGATCTACCGTATTTGCTGT
SMAD3	Forward:	AGGGGCTCCCTCACGTTATC
	Reverse:	CATGGCCCGTAATTCATGGTG
WRB	Forward:	CTGGTGTTGAGCTTCGTGTTC
	Reverse:	GCACCCTGGAAATAAACGAGGA
	Reverse:	AACGCTTCACGAATTTGCGT
LINC00174	Forward:	CTAGAATTCGTGGTTTGATCTTGGCTCACTGCA
	Reverse:	CTAGGATCCTTTAAAACAGAAATCACTGAAACCAC
miR-150-5p	Forward:	TCTCCCAACCCTTGTACCAGTG
	Reverse:	CTCTACAGCTATATTGCCAGCCAC
miR-378a-3p	Forward:	ACTGGACTTGGAGTCAGAAGGC
	Reverse:	CTCTACAGCTATATTGCCAGCCAC
GAPDH	Forward:	TGTTCGTCATGGGTGTGAAC
	Reverse:	ATGGCATGGACTGTGGTCAT
U6	Forward:	CTCGCTTCGGCAGCACA
